# Supplementary material for: Association of the Single Nucleotide Polymorphisms in RUNX1, DYRK1A, and KCNJ15 with Blood Related Traits in Pigs
Source: PubMed Central journal article supplement — Asian-Australas J Anim Sci. 2016 Aug 4;29(12):1675–81. doi: 10.5713/ajas.16.0348 (PMC5088413; doi:10.5713/ajas.16.0348), 2016-08-04
Supplement: ajas-29-12-1675-supplementary.pdf [file ajas-29-12-1675-supplementary.pdf]

Table S1. Positional candidate genes within QTL support interval region (SW38-S0215) on SSC13

| Gene                | Locus<br>(Start – Stop)* |           | Accession No.  | Description                                                                             |
|---------------------|--------------------------|-----------|----------------|-----------------------------------------------------------------------------------------|
| <i>LOC100152482</i> | 206661900                | 206663813 | XM_003358929.1 | oligodendrocyte transcription factor 2-like                                             |
| <i>LOC100620095</i> | 206713880                | 206714794 | XM_003358931.1 | oligodendrocyte transcription factor 1-like                                             |
| <i>LOC100620748</i> | 206922534                | 206924684 | XM_003358936.1 | dnaI homolog subfamily C member 28-like                                                 |
| <i>LOC100620652</i> | 206941093                | 206969505 | XM_003358935.1 | trifunctionalpurine biosynthetic protein adenosine-3-like                               |
| <i>DBP-5</i>        | 206972831                | 207005201 | XM_003358932.1 | son3 protein                                                                            |
| <i>DONSON</i>       | 207004326                | 207014612 | XM_003358934.1 | downstream neighbor of SON                                                              |
| <i>CRYZL1</i>       | 207015352                | 207077229 | NM_001098596.1 | crystallin, zeta (quinone reductase)-like 1                                             |
| <i>LOC100622454</i> | 207143842                | 207200200 | XM_003358946.2 | intersectin-1-like                                                                      |
| <i>LOC100737549</i> | 207203154                | 207280868 | XM_003483356.1 | intersectin-1-like                                                                      |
| <i>LOC100622563</i> | 207293970                | 207316331 | XM_003358947.2 | intersectin-1-like                                                                      |
| <i>LOC733678</i>    | 207336292                | 207346559 | NM_001044606.2 | ATP synthase H <sup>+</sup> -transporting mitochondrial F1 complex O subunit            |
| <i>LOC100510984</i> | 207517599                | 207586370 | XM_003132757.3 | uncharacterized LOC100510984                                                            |
| <i>SLC5A3</i>       | 207541715                | 207543871 | XM_003358937.1 | solute carrier family 5 (sodium/myo-inositolcotransporter), member 3                    |
| <i>KCNE2</i>        | 207808671                | 207809042 | XM_001927946.2 | potassium voltage-gated channel, Isk-related family, member 2                           |
| <i>LOC100511159</i> | 207813875                | 207846766 | XM_003132758.1 | protein FAM165B-like                                                                    |
| <i>LOC100621502</i> | 207879824                | 207887836 | XM_003358939.1 | potassium voltage-gated channel subfamily E member 1-like                               |
| <i>RCAN1</i>        | 207934802                | 207945091 | NM_001243913.1 | regulator of calcineurin 1                                                              |
| <i>CLIC6</i>        | 208080351                | 208130617 | XM_003358948.1 | chloride intracellular channel 6                                                        |
| <i>LOC100621586</i> | 208163975                | 208164559 |                | 60S ribosomal protein L19-like                                                          |
| <i>RUNX1</i>        | 208205560                | 208300127 | NM_001246252.1 | runt-related transcription factor 1                                                     |
| <i>LOC100622010</i> | 208453631                | 208456395 | XR_131030.1    | uncharacterized LOC100622010                                                            |
| <i>LOC100737721</i> | 209379479                | 209383643 | XM_003483357.1 | uncharacterized LOC100737721                                                            |
| <i>LOC100623043</i> | 209458533                | 209458912 |                | proteasome assembly chaperone 4-like                                                    |
| <i>LOC100622064</i> | 209699367                | 209703864 | XM_003358942.1 | uncharacterized LOC100622064                                                            |
| <i>SETD4</i>        | 209715202                | 209740272 | XM_003358943.1 | SET domain containing 4                                                                 |
| <i>LOC100622246</i> | 209751977                | 209758101 | XM_003358944.1 | carbonyl reductase [NADPH] 1-like                                                       |
| <i>CBR3</i>         | 209842863                | 209852618 | NM_001244732.1 | carbonyl reductase 3                                                                    |
| <i>DOPEY2</i>       | 209882344                | 210009502 | XM_003132763.1 | dopey family member 2                                                                   |
| <i>MORC3</i>        | 210024240                | 210066421 | XM_003132764.1 | MORC family CW-type zinc finger 3                                                       |
| <i>CHAF1B</i>       | 210075155                | 210099935 | XM_003132765.1 | chromatin assembly factor 1, subunit B (p60)                                            |
| <i>LOC100513760</i> | 210106849                | 210130608 | XM_003132766.3 | uncharacterized LOC100513760                                                            |
| <i>CLDN14</i>       | 210156559                | 210157513 | NM_001161642.1 | claudin 14                                                                              |
| <i>LOC100623917</i> | 210439397                | 210478671 | XM_003358951.2 | single-minded homolog 2-like                                                            |
| <i>HLCS</i>         | 210483855                | 210670282 | XM_003132771.3 | Holocarboxylasesynthetase (biotin-(propionyl-CoA-carboxylase (ATP-hydrolysing)) ligase) |
| <i>LOC100624407</i> | 210670289                | 210684639 | XM_003358954.1 | uncharacterized LOC100624407                                                            |
| <i>LOC100153272</i> | 210717956                | 210727523 | XM_001928073.2 | protein ripply3-like                                                                    |
| <i>PIGP</i>         | 210760413                | 210769136 | NM_001243520.1 | phosphatidylinositolglycan anchor biosynthesis, class P                                 |
| <i>TTC3</i>         | 210781584                | 210880629 | XM_003358955.2 | tetratricopeptide repeat domain 3                                                       |
| <i>LOC100738307</i> | 210988730                | 211046114 | XM_003483358.1 | Down syndrome critical region protein 3-like                                            |
| <i>DYRK1A</i>       | 211098364                | 211248171 | XM_003132770.3 | dual-specificity tyrosine-(Y)-phosphorylation regulated kinase 1A                       |
| <i>LOC100738376</i> | 211406307                | 211406865 |                | 60S ribosomal protein L15-like                                                          |
| <i>LOC100515928</i> | 211425031                | 211613214 | XM_003132774.3 | G protein-activated inward rectifier potassium channel 2-like                           |
| <i>KCNJ15</i>       | 211979422                | 212022415 | XM_001928412.2 | potassium inwardly-rectifying channel, subfamily J, member 15                           |
| <i>ERG</i>          | 212086250                | 212156873 | NM_001244456.1 | v-etserythroblastosis virus E26 oncogene homolog (avian)                                |

\* SNP position derived from the *Sus scrofa* 10.2 assembly (NCBI).

Table S2. Primer sets for exonic sequence variants in the *RUNX1*, *DYRK1A*, and *KCNJ15* genes

| Gene          | SNP           | Region                              | Primer             |                                         | Size (bp)                             | $T_m$ (°C) | Restriction enzyme |
|---------------|---------------|-------------------------------------|--------------------|-----------------------------------------|---------------------------------------|------------|--------------------|
|               |               |                                     | Name               | Sequences (5' → 3')                     |                                       |            |                    |
| <i>RUNX1</i>  | SNP1          | Exon6 (c.1331 C<G)                  | R1F                | GATCACAGATCACGTTCACTGC                  | 380                                   | 62         |                    |
|               |               |                                     | R1R                | <i>Biotin</i> -CGTCCTACCACCTCTACTACGG   |                                       |            |                    |
|               |               |                                     | RM1                | AGCCTCAGTAGGGCCGCCAT                    |                                       |            |                    |
|               | SNP2          | Exon6 (c.1319 A<G)                  | R2F                | <i>Biotin</i> -GATCACAGATCACGTTCACTGC   | 380                                   | 62         |                    |
|               |               |                                     | R2R                | CGTCCTACCACCTCTACTACGG                  |                                       |            |                    |
|               |               |                                     | RM2                | CAACATGGCGCCTGCCGCGC                    |                                       |            |                    |
| <i>DYRK1A</i> | SNP1          | Exon11 (c.2989 G<A)                 | D1F                | GGTGGGAAGTTTGGTTTTTTG                   | 588                                   | 62         | <i>Bam</i> HI      |
|               |               |                                     | D1R                | TGTGACCTTCAACCAATAAGGA                  |                                       |            |                    |
|               |               |                                     | D2F                | GCCAATAACCTGTTCAAAA                     |                                       |            |                    |
|               | D2R           | <i>Biotin</i> -CAGGCCTGACATTTGGTTAC |                    |                                         |                                       |            |                    |
|               | DM1           | GAACAAAAGCAGGTTTTTAT                |                    |                                         |                                       |            |                    |
|               | SNP3          | Exon11 (c.5070 C<A)                 | D3F                | <i>Biotin</i> -GTCCTCAGACTCTTTACTATGCTT | 298                                   | 64         |                    |
|               |               |                                     | D3R                | ACAAACTATTCGCACTCTGAATC                 |                                       |            |                    |
|               |               |                                     | DM2                | CTAGTTTGCTTTTTACACAC                    |                                       |            |                    |
|               | <i>KCNJ15</i> | SNP1                                | Exon2 (g.-293 C<G) | K1F                                     | <i>Biotin</i> -TTCCTTCAGGTAAATCCTACCC | 297        |                    |
| K1R           |               |                                     |                    | GTGCACGATTTAAGTCACTTTT                  |                                       |            |                    |
| KM1           |               |                                     |                    | ACGCTGGCTGGATGTGAAG                     |                                       |            |                    |
| SNP2          |               | Exon3 (g.-207 G<A)                  | K2F                | <i>Biotin</i> -CCTTTACTACTACTGCCTCTGAA  | 260                                   | 62         |                    |
|               |               |                                     | K2R                | GCAAAGCAAAAGGCTCCTC                     |                                       |            |                    |
|               |               |                                     | KM2                | CTTTTCTCTCTGTCAACTC                     |                                       |            |                    |
| SNP3          |               | Exon5 (g.1029 T<C)                  | K3F                | CTCTCCAAAACCGCAAGTAC                    | 486                                   | 64         |                    |
|               |               |                                     | K3R                | <i>Biotin</i> -CCCTCCACCAAGTTCTTTGA     |                                       |            |                    |
|               |               |                                     | KM3                | AAGTACAGGCAGGAGGATCA                    |                                       |            |                    |
| SNP4          |               | Exon5 (g.1161 T<C)                  | KM4                | CGCCTCAGCTTAGCTCCTTC                    |                                       |            |                    |
| SNP5          |               | Exon5 (g.1232 G<A)                  | KM5                | GAAAACAAAACCTGCGTGGCC                   |                                       |            |                    |

Table S3. Genotype and allele frequencies of the SNPs detected in RUNX1, DYRK1A, and KCNJ15 genes in a resource population between Landrace and KNP

|                                    | Genotype frequencies |       |       | Allele frequencies |       | MAF<br>Minor allele |
|------------------------------------|----------------------|-------|-------|--------------------|-------|---------------------|
| <b>RUNX1-SNP1 (c.1331 C&lt;G)</b>  | CC                   | CG    | GG    | C                  | G     |                     |
| KNP                                | 0.053                | 0.579 | 0.368 | 0.342              | 0.658 | 0.1983              |
| Landrace                           | -                    | 0.176 | 0.824 | 0.088              | 0.912 | C                   |
| F <sub>2</sub>                     | 0.085                | 0.427 | 0.489 | 0.298              | 0.702 |                     |
| <b>RUNX1-SNP2 (c.1319 A&lt;G)</b>  | AA                   | AG    | GG    | A                  | G     |                     |
| KNP                                | -                    | 0.316 | 0.684 | 0.158              | 0.842 | 0.1293              |
| Landrace                           | -                    | 0.059 | 0.941 | 0.029              | 0.971 | A                   |
| F <sub>2</sub>                     | 0.012                | 0.160 | 0.828 | 0.092              | 0.908 |                     |
| <b>DYRK1A-SNP1 (c.2989 G&lt;A)</b> | GG                   | GA    | AA    | G                  | A     |                     |
| KNP                                | -                    | -     | 1.000 | -                  | 1.000 | 0.3707              |
| Landrace                           | 0.588                | 0.412 | -     | 0.794              | 0.206 | G                   |
| F <sub>2</sub>                     | 0.112                | 0.510 | 0.377 | 0.367              | 0.633 |                     |
| <b>DYRK1A-SNP2 (c.4332 C&lt;T)</b> | CC                   | CT    | TT    | C                  | T     |                     |
| KNP                                | -                    | -     | 1.000 | -                  | 1.000 | 0.0431              |
| Landrace                           | -                    | 0.059 | 0.941 | 0.029              | 0.971 | C                   |
| F <sub>2</sub>                     | -                    | 0.061 | 0.939 | 0.030              | 0.970 |                     |
| <b>DYRK1A-SNP3 (c.5070 C&lt;A)</b> | CC                   | CA    | AA    | C                  | A     |                     |
| KNP                                | 0.111                | 0.444 | 0.444 | 0.333              | 0.667 | 0.1667              |
| Landrace                           | -                    | -     | 1.000 | -                  | 1.000 | C                   |
| F <sub>2</sub>                     | 0.019                | 0.222 | 0.759 | 0.130              | 0.870 |                     |
| <b>KCNJ15-SNP1 (g.-293 C&lt;G)</b> | CC                   | CG    | GG    | C                  | G     |                     |
| KNP                                | 0.158                | 0.579 | 0.263 | 0.447              | 0.553 | 0.2241              |
| Landrace                           | -                    | -     | 1.000 | -                  | 1.000 | C                   |
| F <sub>2</sub>                     | 0.039                | 0.357 | 0.605 | 0.217              | 0.783 |                     |
| <b>KCNJ15-SNP2 (g.-207 G&lt;A)</b> | GG                   | GA    | AA    | G                  | A     |                     |
| KNP                                | 0.158                | 0.632 | 0.211 | 0.474              | 0.526 | 0.2328              |
| Landrace                           | -                    | -     | 1.000 | -                  | 1.000 | G                   |
| F <sub>2</sub>                     | 0.032                | 0.304 | 0.664 | 0.184              | 0.816 |                     |
| <b>KCNJ15-SNP3 (g.1029 T&lt;C)</b> | TT                   | TC    | CC    | T                  | C     |                     |
| KNP                                | 0.158                | 0.632 | 0.211 | 0.474              | 0.526 | 0.2328              |
| Landrace                           | -                    | -     | 1.000 | -                  | 1.000 | T                   |
| F <sub>2</sub>                     | 0.035                | 0.337 | 0.628 | 0.204              | 0.796 |                     |
| <b>KCNJ15-SNP4 (g.1161 T&lt;C)</b> | TT                   | TC    | CC    | T                  | C     |                     |
| KNP                                | 0.105                | 0.474 | 0.421 | 0.342              | 0.658 | 0.4397              |
| Landrace                           | 0.176                | 0.529 | 0.294 | 0.441              | 0.559 | T                   |
| F <sub>2</sub>                     | 0.141                | 0.590 | 0.269 | 0.436              | 0.564 |                     |
| <b>KCNJ15-SNP5 (g.1232 G&lt;A)</b> | GG                   | GA    | AA    | G                  | A     |                     |
| KNP                                | -                    | 0.053 | 0.947 | 0.026              | 0.974 | 0.2586              |
| Landrace                           | 0.294                | 0.529 | 0.176 | 0.559              | 0.441 | G                   |
| F <sub>2</sub>                     | 0.037                | 0.387 | 0.576 | 0.230              | 0.770 |                     |
